# Supplementary material for: Enhancement of the Catalytic Performance and Operational Stability of Sol-Gel-Entrapped Cellulase by Tailoring the Matrix Structure and Properties
Source: MDPI journal article supplement (doi:10.3390/gels8100626), 2022-10-01
Supplement: s1 [file s1]

# Enhancement of the Catalytic Performance and Operational Stability of Sol-Gel Entrapped Cellulase by Tailoring the Matrix Structure and Properties

Corina Vasilescu <sup>1,2</sup>, Simona Marc <sup>1,3</sup>, Iosif Hulka <sup>4</sup> and Cristina Paul <sup>1,\*</sup>

<sup>1</sup> Biocatalysis Group, Department of Applied Chemistry and Engineering of Organic and Natural Compounds, Faculty of Industrial Chemistry and Environmental Engineering, Politehnica University Timisoara, Carol Telbisz 6, 300001 Timisoara, Romania;

<sup>2</sup> Laboratory of Magnetic Fluids, Center for Fundamental and Advanced Technical Research, Romanian Academy Timisoara Branch, Mihai Viteazu 24, 300223 Timisoara, Romania;

<sup>3</sup> Faculty of Veterinary Medicine, University of Life Sciences "King Mihai I" from Timisoara, Calea Aradului 119, 300645 Timisoara, Romania;

<sup>4</sup> Research Institute for Renewable Energy, Politehnica University Timisoara, Gavril Musicescu 138, 300501 Timisoara, Romania

\* Correspondence: cristina.paul@upt.ro

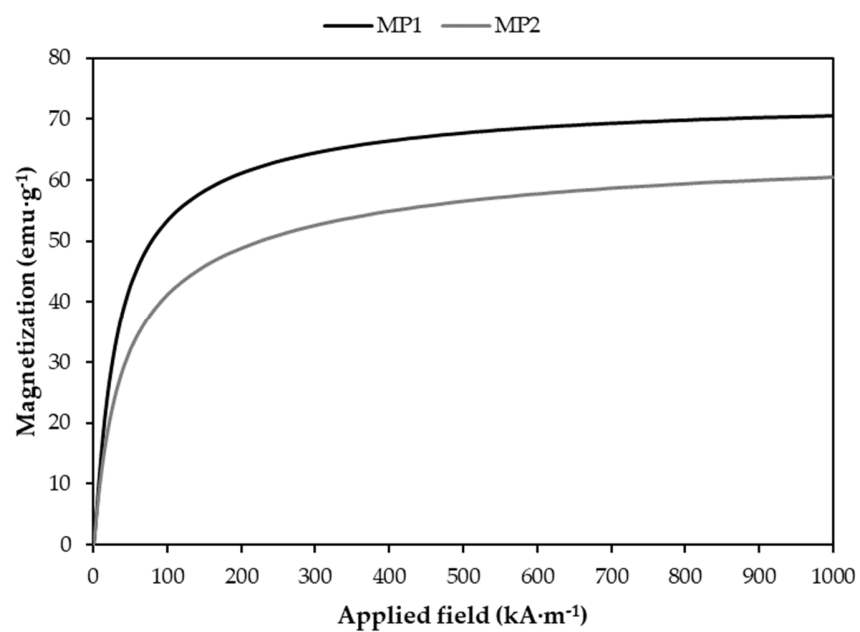

**Figure S1.** Magnetization curves of the magnetic nanoparticles MP1 and MP2.

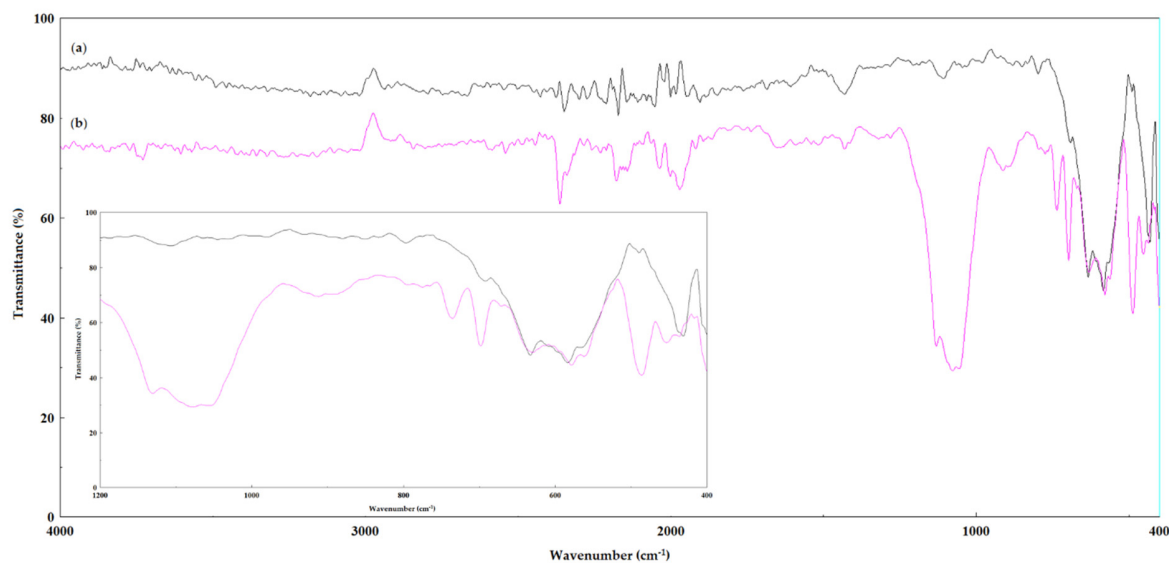

**Figure S2.** FT-IR spectra of: **(a)** magnetic support MP2 and **(b)** cellulase biocatalyst (M2-SG9), obtained by magnetic sol-gel immobilization method with silane precursors VTMOs: PhTMOs:TMOS (0.4:1.6:1) and MP2. Inset: enlarged picture of the 400-1200 cm<sup>-1</sup> region, showing the presence of the absorption bands specific for the maghemite.

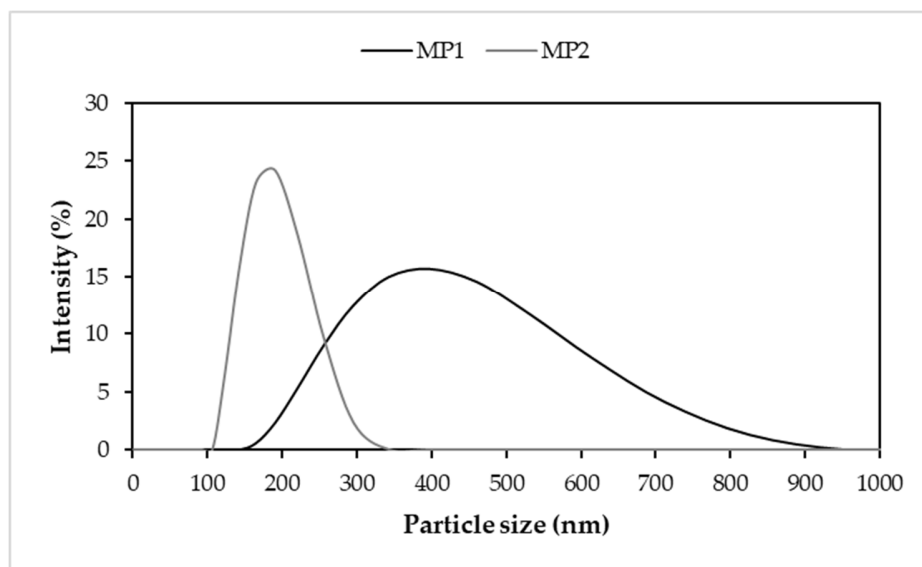

**Figure S3.** Hydrodynamic size distributions of the magnetic nanoparticles MP1 and MP2 as determined by DLS.
